# Supplementary material
Source: PubMed Central journal article supplement (PMC5851139)
Supplement: JCB699223_supplementary_material.pdf [file JCB699223_supplementary_material.pdf]

A.

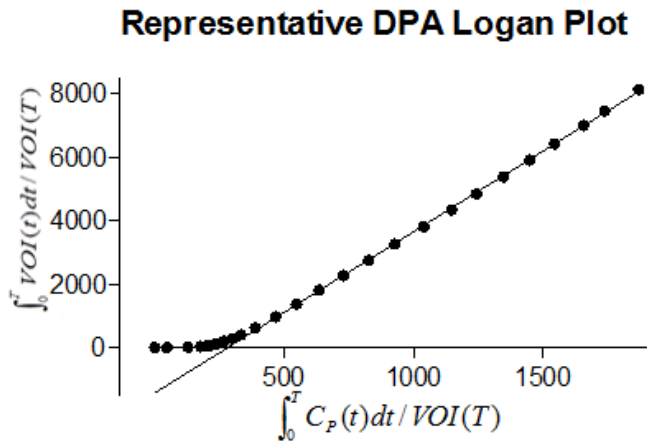

B.

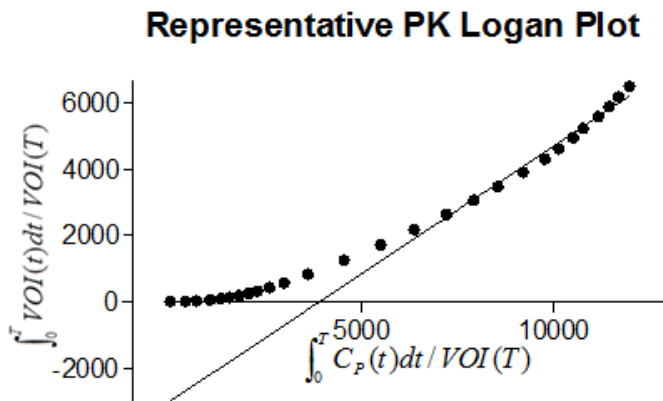

**Supplemental Figure 1.** Representative Logan plot in frontal cortex for  $^{11}\text{C}$ -DPA-713 (A) and  $^{11}\text{C}$ -(R)-PK11195 (B).

VOI: volume of interest

**A**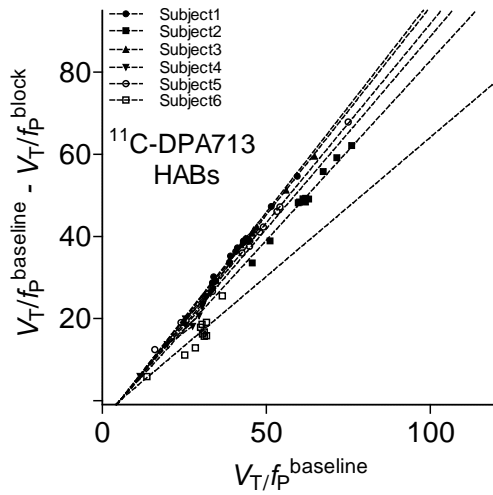**B**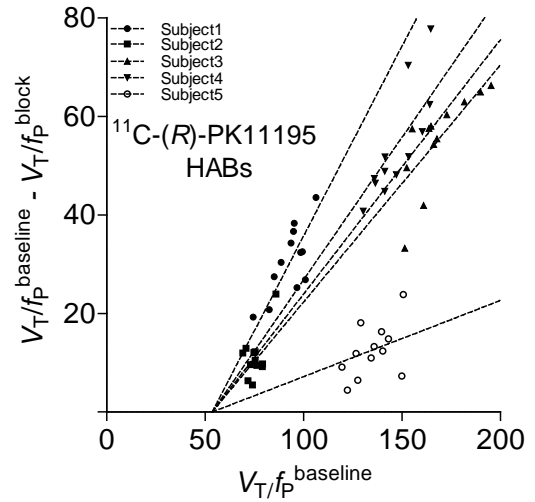**C**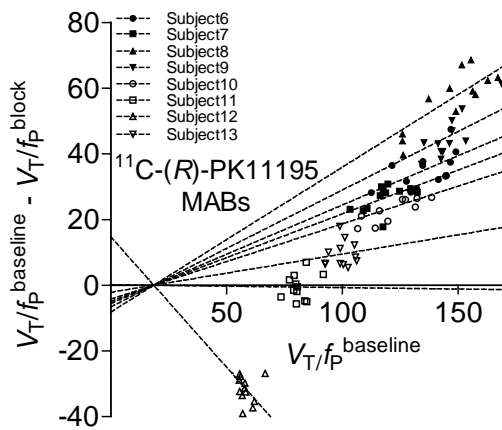**D**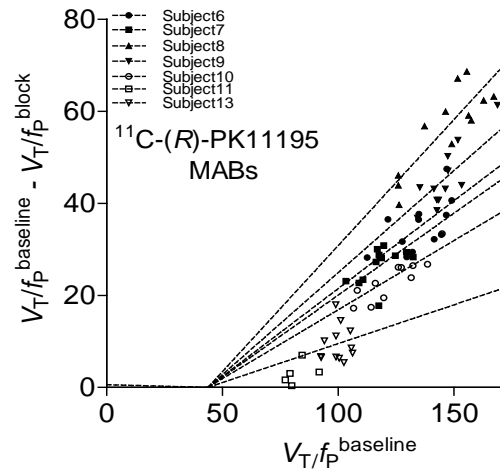

**Supplemental Figure 2.** Lassen occupancy plot to determine nondisplaceable uptake ( $V_{ND}$ ) corrected for plasma free fraction ( $V_{ND}/f_P$ ) of  $^{11}\text{C}$ -DPA-173 in brain of six HABS (A) and  $^{11}\text{C}$ -(R)-PK11195 in brain of five HABS (B) and eight MABS (C). Each point represents a brain region in an individual subject. Because one MAB (subject #12) showed a paradoxical increase of  $V_{T}/f_P$  after administration of XBD173,  $V_{ND}/f_P$  was determined after eliminating this subject (D). The coefficients of determination ( $R^2$ ) are shown for each relationship.

HABS = high-affinity binders, MABS = mixed-affinity binders, LABs = low-affinity binders.

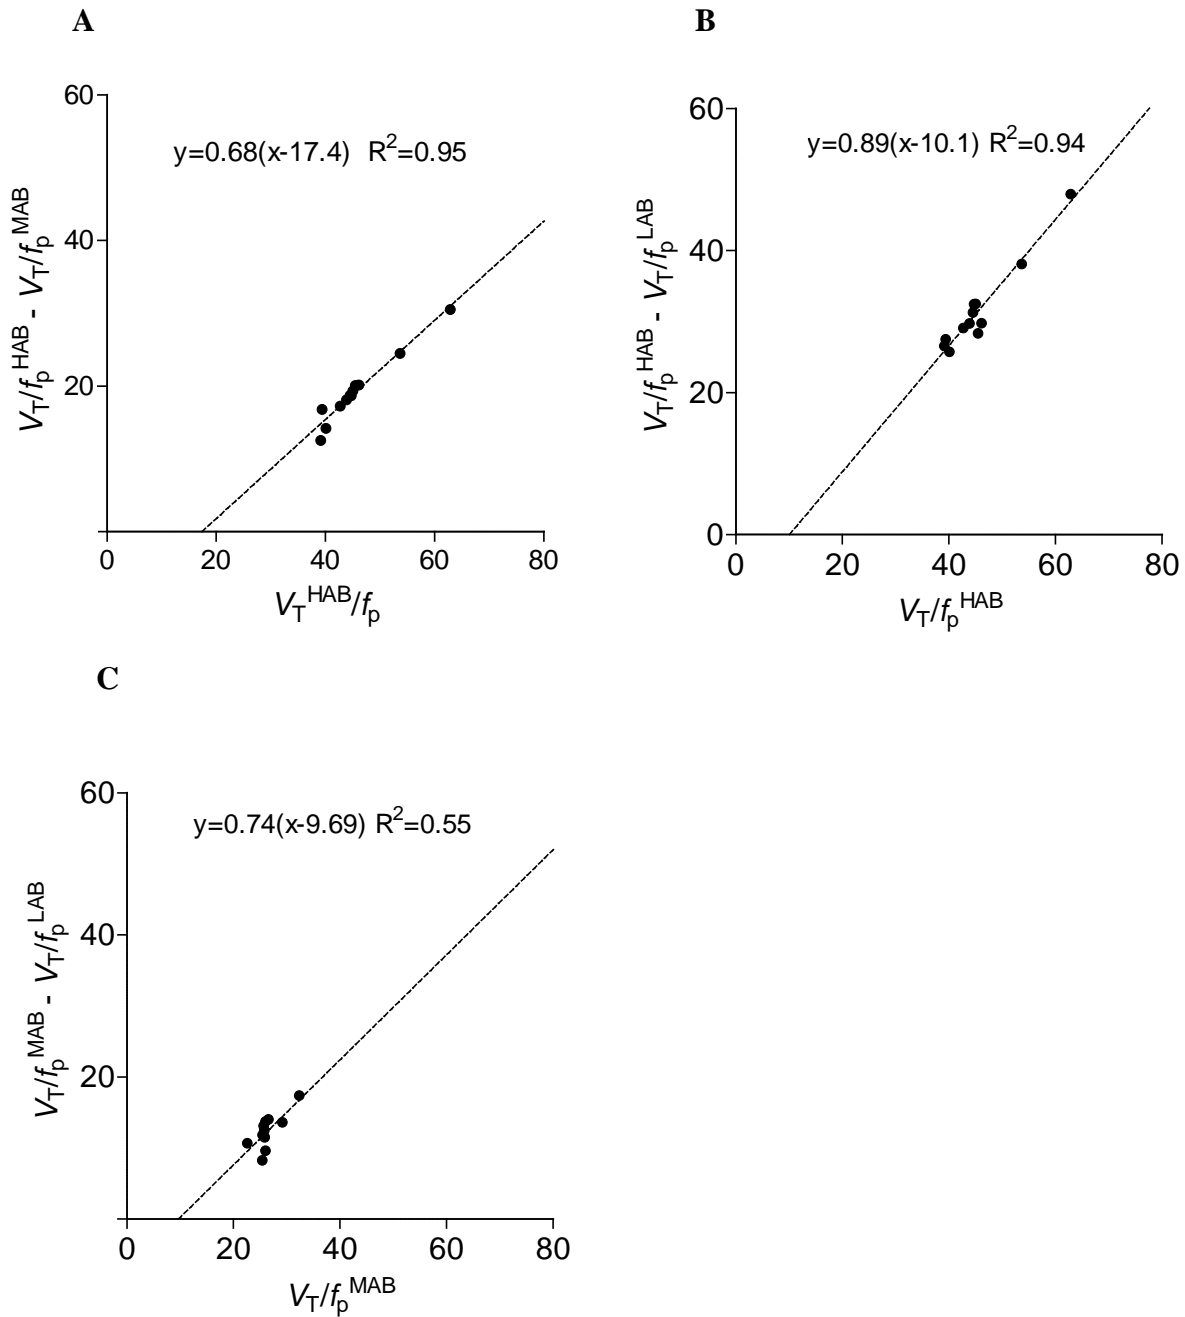

**Supplemental Figure 3.** Polymorphism plot to determine a population average of nondisplaceable uptake ( $V_{\text{ND}}$ ) corrected for plasma free fraction ( $V_{\text{ND}}/f_p$ ) of  $^{11}\text{C}$ -DPA-713 in 14 HABs, five MABs, and three LABs. The plots were performed for three different combinations of the affinity types. The plots were performed using average  $V_T/f_p$  values in each VOI of the same affinity type.

HABs = high-affinity binders, MABs = mixed-affinity binders, LABs = low-affinity binders.

**Supplemental Table 1.** Injected mass, injected activity, and  $f_p$  for baseline scan of  $^{11}\text{C}$ -DPA-713 and  $^{11}\text{C}$ -(R)-PK11195.

| Radioligands                 | $^{11}\text{C}$ -DPA-713 |           |           |           | $^{11}\text{C}$ -(R)-PK11195 |           |           |           |
|------------------------------|--------------------------|-----------|-----------|-----------|------------------------------|-----------|-----------|-----------|
|                              | All                      | HABs      | MABs      | LABs      | All                          | HABs      | MABs      | LABs      |
| Injected mass dose (pmol/kg) | 104 ± 57                 | 110 ± 61  | 67 ± 34   | 124 ± 41  | 104 ± 71                     | 57 ± 30   | 134 ± 81  | 103 ± 48  |
| Injected activity (MBq)      | 698 ± 95                 | 683 ± 114 | 734 ± 10  | 731 ± 16  | 669 ± 39                     | 690 ± 67  | 662 ± 12  | 661 ± 29  |
| $f_p$ (%)                    | 8.0 ± 2.2                | 8.4 ± 2.7 | 7.4 ± 1.4 | 7.8 ± 0.8 | 0.7 ± 0.2                    | 0.7 ± 0.1 | 0.7 ± 0.3 | 0.6 ± 0.1 |

HABs = high-affinity binders, MABs = mixed-affinity binders, LABs = low-affinity binders. Data are mean ± SD.

**Supplemental Table 2.** Plasma free fraction ( $f_p$ ) in baseline and blocked scans

| Parameters             | <sup>11</sup> C-DPA-713 |           | <sup>11</sup> C-( <i>R</i> )-PK11195 |             |
|------------------------|-------------------------|-----------|--------------------------------------|-------------|
|                        | Base                    | Block     | Base                                 | Block       |
| $f_p^{\text{HAB}}$ (%) | 8.4 ± 2.7               | 7.7 ± 0.5 | 0.62 ± 0.10                          | 0.74 ± 0.04 |
| $f_p^{\text{MAB}}$ (%) | 7.4 ± 1.4               | N/A       | 0.72 ± 0.38                          | 0.71 ± 0.12 |
| $f_p^{\text{LAB}}$ (%) | 7.8 ± 0.8               | N/A       | 0.62 ± 0.07                          | 0.67 ± 0.14 |
| $f_p^{\text{All}}$ (%) | 8.0 ± 2.2               | 7.7 ± 0.5 | 0.67 ± 0.27                          | 0.71 ± 0.10 |

**Supplemental Table 3.** Total distribution volume, non-displaceable uptake, and non-displaceable binding potential of  $^{11}\text{C}$ -DPA-713 and  $^{11}\text{C}$ -(*R*)-PK11195 normalized for  $f_p$  in whole brain obtained through occupancy plot.

| Parameters                                   | $^{11}\text{C}$ -DPA-713 | $^{11}\text{C}$ -( <i>R</i> )-PK11195 |
|----------------------------------------------|--------------------------|---------------------------------------|
| $V_T^{\text{HAB}}/f_p$ (mL/cm <sup>3</sup> ) | 46.4 ± 19.0              | 124 ± 39                              |
| $V_T^{\text{MAB}}/f_p$ (mL/cm <sup>3</sup> ) | 26.4 ± 3.1               | 114 ± 32                              |
| $V_T^{\text{LAB}}/f_p$ (mL/cm <sup>3</sup> ) | 14.0 ± 4.8               | 89 ± 27                               |
| $V_{\text{ND}}$ (mL/cm <sup>3</sup> )        | 5.43 (4.20-6.67)         | 53.7 (38.7-68.7)                      |
| $BP_{\text{ND}}^{\text{HAB}}$                | 7.36 ± 2.28              | 1.31 ± 0.73                           |
